# Supplementary material for: Overexpression of HVA1 Enhances Drought and Heat Stress Tolerance in Triticum aestivum Doubled Haploid Plants
Source: MDPI journal article supplement (doi:10.3390/cells11050912), 2022-03-07
Supplement: s1 [file s1]

**Supplementary Table S1. List of primers used for the qPCR analysis**

| S.No | Primer Name                                           | Primer Sequence         |
|------|-------------------------------------------------------|-------------------------|
| 1    | <i>TaHsfA6 RT F</i>                                   | TAGACGTGGAGGTGGAGGAG    |
| 2    | <i>TaHsfA6 RT R</i>                                   | ATCTGAACTTCCGGAGCGTA    |
| 3    | <i>TaABI19 RT F</i>                                   | GTGTAAGCCAAGCCGGTGAT    |
| 4    | <i>TaABI19 RT F</i>                                   | CACACCGTACGTGACCCATACT  |
| 5    | <i>TaHSP70 RT F</i>                                   | TCGCCTACGGCCTTGACA      |
| 6    | <i>TaHSP70 RT R</i>                                   | ATGGTCAGCAGCGACACATC    |
| 7    | <i>TaHSP17 RT F</i>                                   | CGAGAATGCTGACATGGAGA    |
| 8    | <i>TaHSP17 RT R</i>                                   | ACCTGGACCTGGATGGTCTT    |
| 9    | <i>Caleosin RT F</i>                                  | TGTACGACGGCAGCCTCTTC    |
| 10   | <i>Caleosin RT R</i>                                  | GCTCCGACCATGCGAGTTT     |
| 11   | <i>Cytochrome P-450 RT F</i>                          | AAAGTCGAAACACCTCACC     |
| 12   | <i>Cytochrome P-450 RT F</i>                          | GTGACGAGGAAGGAGTGGAG    |
| 13   | <i>Haeme Peroxidase RT F</i>                          | GGGATTCTTCAGTTGCCATTG   |
| 14   | <i>Haeme Peroxidase RT R</i>                          | TTGTTCGGTCAAGCCCATTG    |
| 15   | <i>AP2 domain CBF protein RT F</i>                    | TGTTCTTGAAAATTGGCGCTAA  |
| 16   | <i>AP2 domain CBF protein RT R</i>                    | TCTGTAACCGCTCAGCAAACCTG |
| 17   | <i>TaHSP20 RT F</i>                                   | CATCGACTGGAAGGAGATGC    |
| 18   | <i>TaHSP20 RT F</i>                                   | CTTCTGCTCCTGCTCCTTGT    |
| 19   | <i>Lipoxygenase RT F</i>                              | TGCGGATTTCTTTGTTGGTTT   |
| 20   | <i>Lipoxygenase RT R</i>                              | CGTTTTGTGAGAGCTGTTTCCA  |
| 21   | <i>Chaperonin CPN60-2, mitochondrial RT F</i>         | GCCTACAGCAAACCTTTGACCAA |
| 22   | <i>Chaperonin CPN60-2, mitochondrial RT R</i>         | CCCCTTCTACACCCGCATT     |
| 23   | <i>E3 ubiquitin-protein ligase RNF5 RT F</i>          | TCTGGATGGTCTTCCTCTGCAT  |
| 24   | <i>E3 ubiquitin-protein ligase RNF5 RT R</i>          | GGGATGACCTCCCAACAATTG   |
| 25   | <i>Ferredoxin RT F</i>                                | GCACAAGGTGAAGCTCGTC     |
| 26   | <i>Ferredoxin RT R</i>                                | GCACGAGTAGGGCAGCTC      |
| 27   | <i>Salt-induced YSK2 dehydrin 3 RT F</i>              | CGGTCGCCACTTCTGAGAGT    |
| 28   | <i>Salt-induced YSK2 dehydrin 3 RT R</i>              | CACGCAAGTGAGCTAGGTGAAC  |
| 29   | <i>Dehydrin 7 RT F</i>                                | CCAGGACACACCGGAATGAC    |
| 30   | <i>Dehydrin 7 RT R</i>                                | CGCCAGCCAGGCTCAGT       |
| 31   | <i>Rab protein RT F</i>                               | GGCCGCCACTTCTGAGAGT     |
| 32   | <i>Rab protein RT F</i>                               | GGCTCACGTTGTATGGTGGAA   |
| 33   | <i>HSF85 RT F</i>                                     | TGGCTTTTTAGACGACGTGGTA  |
| 34   | <i>HSF85 RT R</i>                                     | TGGGCTGCTTCACCAAAAAT    |
| 35   | <i>Putative NAC domain containing protein 94 RT F</i> | AGGGCATCCGCAATTCAG      |
| 36   | <i>Putative NAC domain containing protein 94 RT R</i> | ATGGCAGCTTCGGTTCCTT     |
| 37   | <i>Fatty acly-CoA reductase RT F</i>                  | CTGCGGTGATCGGGTGTT      |
| 38   | <i>Fatty acly-CoA reductase RT R</i>                  | GGCTGGACCCTCAGGATCTT    |
| 39   | <i>S-Receptor kinase PK3-like RT F</i>                | CCCCAGACAAGCAAACCAAT    |

|    |                                             |                        |
|----|---------------------------------------------|------------------------|
| 40 | <i>S-Receptor kinase PK3-like RT R</i>      | GGTGACGGCAAGGAATGC     |
| 41 | <i>Serine/threonine protein kinase RT F</i> | CAGGAATGTTCACCGTGGAGAT |
| 42 | <i>Serine/threonine protein kinase RT R</i> | CCGGTCCAGTTGCCAGTTT    |
| 43 | <i>Chitinase IV RT F</i>                    | TGCAGCTGTCGTGGAACACTAC |
| 44 | <i>Chitinase IV RT R</i>                    | CTTGAACGTTAACGCCTGGT   |
